# Supplementary material
Source: PubMed Central journal article supplement (PMC4476968)
Supplement: NIHMS642382-supplement-01.pdf [file NIHMS642382-supplement-01.pdf]

| Patient Number                                                             | AGS 1              | AGS 2            | AGS 3            | AGS 4              | AGS 5            | AGS 6            | AGS 7              | AGS 8            | AGS 9              | AGS 10             | AGS 11             | AGS 12             | AGS 13           | AGS 14             | AGS 15           | AGS 16           | AGS 17           | AGS 18           | AGS 19           |                  |
|----------------------------------------------------------------------------|--------------------|------------------|------------------|--------------------|------------------|------------------|--------------------|------------------|--------------------|--------------------|--------------------|--------------------|------------------|--------------------|------------------|------------------|------------------|------------------|------------------|------------------|
| <b>Age of Onset</b>                                                        | UNK                | 3 mo.            | < 1 mo.          | 1 mo.              | 3 mo.            | < 1 mo.          | UNK                | UNK              | 1 mo.              | 1 mo.              | <1 mo.             | 1 mo.              | <1 mo.           | 1 mo.              | 1 mo.            | 7 mo.            | 3 mo.            | 3 mo.            | <1 mo.           |                  |
| <b>Sex</b>                                                                 | M                  | M                | M                | F                  | M                | M                | M                  | M                | F                  | F                  | F                  | F                  | M                | F                  | M                | M                | M                | F                | M                |                  |
| <b>Age at MRI</b>                                                          | 3 mo.              | 4 mo.            | 2 mo.            | 2 mo.              | 13 mo.           | 2 wks.           | 2 yrs.             | 1 mo.            | 5 mo.              | 6 mo.              | 1 mo.              | 3 mo.              | 1 wk.            | 3 mo.              | 4 mo.            | 7 mo.            | 2 mo.            | 5 mo.            | 4 mo.            |                  |
| <b>Gene</b>                                                                | RNase H2C          | TREX1            | RNaseH 2C        | RNase H2B          | TREX1            | TREX1            | RNase H2C          | RNase H2C        | TREX1              | TREX1              | TREX1              | RNase H2C          | TREX1            | RNase H2B          | SAMH D1          | TREX1            | TREX1            | RNase H2B        | SAMH D1          |                  |
| <b>Outcome (Developmental Delay; G-tube dependent; ambulatory; verbal)</b> | +<br>UNK<br>-<br>- | +<br>+<br>-<br>- | +<br>+<br>-<br>- | +<br>UNK<br>-<br>- | +<br>+<br>-<br>- | +<br>-<br>-<br>- | +<br>UNK<br>-<br>- | +<br>+<br>-<br>- | +<br>UNK<br>-<br>- | +<br>UNK<br>-<br>- | +<br>UNK<br>-<br>- | +<br>UNK<br>-<br>- | +<br>-<br>-<br>- | +<br>UNK<br>-<br>- | +<br>-<br>-<br>- | +<br>+<br>-<br>- | +<br>-<br>-<br>- | +<br>+<br>-<br>- | +<br>-<br>-<br>- | +<br>+<br>-<br>- |

| Patient Number                                                             | AGS 20           | AGS 21           | AGS 22           | AGS 23           | AXD 1            | AXD 2            | AXD 3            | AXD 4            | AXD 5            | AXD 6            | AXD 7                  | AXD 8            | AXD 9                  | CMV 1                  | CMV 2            | CMV 3            | CMV 4            |                  |
|----------------------------------------------------------------------------|------------------|------------------|------------------|------------------|------------------|------------------|------------------|------------------|------------------|------------------|------------------------|------------------|------------------------|------------------------|------------------|------------------|------------------|------------------|
| <b>Age of Onset</b>                                                        | <1 mo.           | 7 mo.            | 1 mo.            | 3 mo.            | 6 mo.            | 18 mo.           | 2 mo.            | UNK              | 22 mo.           | 23 mo.           | 1 mo.                  | 4 mo.            | 1 mo.                  | UNK                    | UNK              | UNK              | UNK              |                  |
| <b>Sex</b>                                                                 | F                | F                | M                | F                | F                | F                | M                | F                | M                | F                | F                      | F                | F                      | M                      | M                | F                | M                |                  |
| <b>Age at MRI</b>                                                          | 3 mo.            | 9 mo.            | 1 mo.            | 4 mo.            | 22 mo.           | 23 mo.           | 8 mo.            | 3 mo.            | 25 mo.           | 27 mo.           | 3 mo.                  | 4 mo.            | 7 mo.                  | 3 yrs.                 | 4 yrs.           | 2 yrs.           | 6 yrs.           |                  |
| <b>Gene</b>                                                                | SAMHD 1          | RNase H2B        | TREX1            | TREX1            | GFAP                   | GFAP             | GFAP                   | N/A                    | N/A              | N/A              | N/A              |                  |
| <b>Outcome (Developmental Delay; G-tube dependent; ambulatory; verbal)</b> | +<br>+<br>-<br>- | +<br>+<br>-<br>+ | +<br>+<br>-<br>- | +<br>+<br>-<br>- | +<br>+<br>-<br>- | +<br>+<br>-<br>- | +<br>-<br>-<br>- | +<br>-<br>-<br>- | +<br>-<br>-<br>- | +<br>-<br>-<br>- | +<br>UNK<br>UNK<br>UNK | +<br>-<br>-<br>- | +<br>UNK<br>UNK<br>UNK | +<br>UNK<br>UNK<br>UNK | +<br>-<br>+<br>- | +<br>-<br>+<br>- | +<br>-<br>-<br>- | +<br>+<br>-<br>- |

| Patient Number                                                             | LCC 1            | LCC 2            | LCC 3            | MLC 1                    | MLC 2                    | MLC 3                    | MLC 4            | MLC 5            | VWM 1              | VWM 2              | VWM 3              | VWM 4            | VWM 5            | VWM 6            | VWM 7                    | VWM 8                    | VWM 9                    |
|----------------------------------------------------------------------------|------------------|------------------|------------------|--------------------------|--------------------------|--------------------------|------------------|------------------|--------------------|--------------------|--------------------|------------------|------------------|------------------|--------------------------|--------------------------|--------------------------|
| <b>Age of Onset</b>                                                        | <1 yr.           | 5 mo             | 2 mo.            | 3 yrs.                   | 8 mo.                    | UNK                      | UNK              | 4 mo             | 8 yrs.             | 5 yrs.             | 3 yrs.             | 15 mo.           | 4 yrs.           | 2 yrs.           | 18 mo.                   | 18 mo.                   | 2½ yrs.                  |
| <b>Sex</b>                                                                 | M                | F                | M                | F                        | M                        | M                        | M                | M                | M                  | M                  | F                  | F                | F                | M                | F                        | F                        | F                        |
| <b>Age at MRI</b>                                                          | 8 yr.            | 19 mo.           | 2 mo.            | 3.5 yrs.                 | 8 yrs.                   | 10 mo                    | 6 mo             | 5 mo.            | 9 yrs.             | 5 yrs.             | 2 yrs.             | 2 yrs.           | 7 yrs.           | 4 yrs.           | 3 yrs.                   | 1½ yrs.                  | 3½ yrs.                  |
| <b>Gene</b>                                                                | UNK              | UNK              | UNK              | MLC1                     | MLC1                     | MLC1                     | MLC1             | HEPA CAM         | eIF2B5             | eIF2B3             | eIF2B5             | eIF2B4           | eIF2B5           | eIF2B5           | eIF2B5                   | eIF2B5                   | eIF2B5                   |
| <b>Outcome (Developmental Delay; G-tube dependent; ambulatory; verbal)</b> | +<br>-<br>+<br>+ | +<br>-<br>-<br>- | +<br>+<br>-<br>+ | UNK<br>UNK<br>UNK<br>UNK | UNK<br>UNK<br>UNK<br>UNK | UNK<br>UNK<br>UNK<br>UNK | +<br>-<br>+<br>+ | +<br>-<br>+<br>+ | +<br>UNK<br>+<br>+ | +<br>UNK<br>-<br>+ | +<br>UNK<br>-<br>- | +<br>+<br>-<br>- | +<br>-<br>-<br>- | +<br>-<br>-<br>- | UNK<br>UNK<br>UNK<br>UNK | UNK<br>UNK<br>UNK<br>UNK | UNK<br>UNK<br>UNK<br>UNK |
